# Supplementary material for: Trimethylamine N-Oxide Response to a Mixed Macronutrient Tolerance Test in a Cohort of Healthy United States Adults
Source: MDPI journal article supplement (doi:10.3390/ijms24032074), 2023-01-20
Supplement: s1 [file s1]

**Supplemental Table S1.** Differential abundance of genus level bacteria identified in participan

| hash ID              | Base Mean   | log2 Fold Change | lfcSE       | Statistic   |
|----------------------|-------------|------------------|-------------|-------------|
| 098c3bbd8234f4ac198: | 2644.797543 | 0.636678934      | 2.919656061 | 126.4650425 |
| 803eb52cfe3d77bdf9fe | 3.71967458  | -1.595559731     | 1.252152435 | 43.60717769 |
| cbb17c39cfea0aa84321 | 19.58395687 | 2.053827386      | 2.93652842  | 21.01484623 |
| a3f9e91d15a189d0cf1e | 61.07314628 | -0.936009287     | 1.534221748 | 9.663043489 |
| a0798db0c868e9ad608  | 142.8544936 | 0.63230722       | 2.935199284 | 25.48475532 |
| 6960eba3db7d4d863d0  | 47.066038   | 0.762509259      | 2.914439392 | 63.01935241 |

ts whose median AUC-TMAO was less than versus greater than 29.25 uM/hr. Differential abur

| P-value     | Adj P-value | Kingdom     | Phylum            | Class              |
|-------------|-------------|-------------|-------------------|--------------------|
| 2.43E-29    | 1.26E-27    | k__Bacteria | p__Bacteroidetes  | c__Bacteroidia     |
| 4.01E-11    | 6.96E-10    | k__Bacteria | p__Actinobacteria | c__Coriobacteriia  |
| 4.56E-06    | 4.74E-05    | k__Bacteria | p__Firmicutes     | c__Bacilli         |
| 0.001880119 | 0.016294363 | k__Bacteria | p__Firmicutes     | c__Erysipelotrichi |
| 4.46E-07    | 5.80E-06    | k__Bacteria | p__Firmicutes     | c__Erysipelotrichi |
| 2.05E-15    | 5.32E-14    | k__Bacteria | p__Firmicutes     | c__Clostridia      |

ndance was performed with the log ratio test in DESeq2.

| Order                 | Family                 | Genus              |
|-----------------------|------------------------|--------------------|
| o__Bacteroidales      | f__Prevotellaceae      | g__Prevotella      |
| o__Coriobacteriales   | f__Coriobacteriaceae   | g__Eggerthella     |
| o__Lactobacillales    | f__Lactobacillaceae    | g__Lactobacillus   |
| o__Erysipelotrichales | f__Erysipelotrichaceae | g__Clostridium     |
| o__Erysipelotrichales | f__Erysipelotrichaceae | g__Catenibacterium |
| o__Clostridiales      | f__Veillonellaceae     | g__Dialister       |
