# Supplementary material for: Trimethylamine N-Oxide Response to a Mixed Macronutrient Tolerance Test in a Cohort of Healthy United States Adults
Source: MDPI journal article supplement (doi:10.3390/ijms24032074), 2023-01-20
Supplement: s1 [file s1]

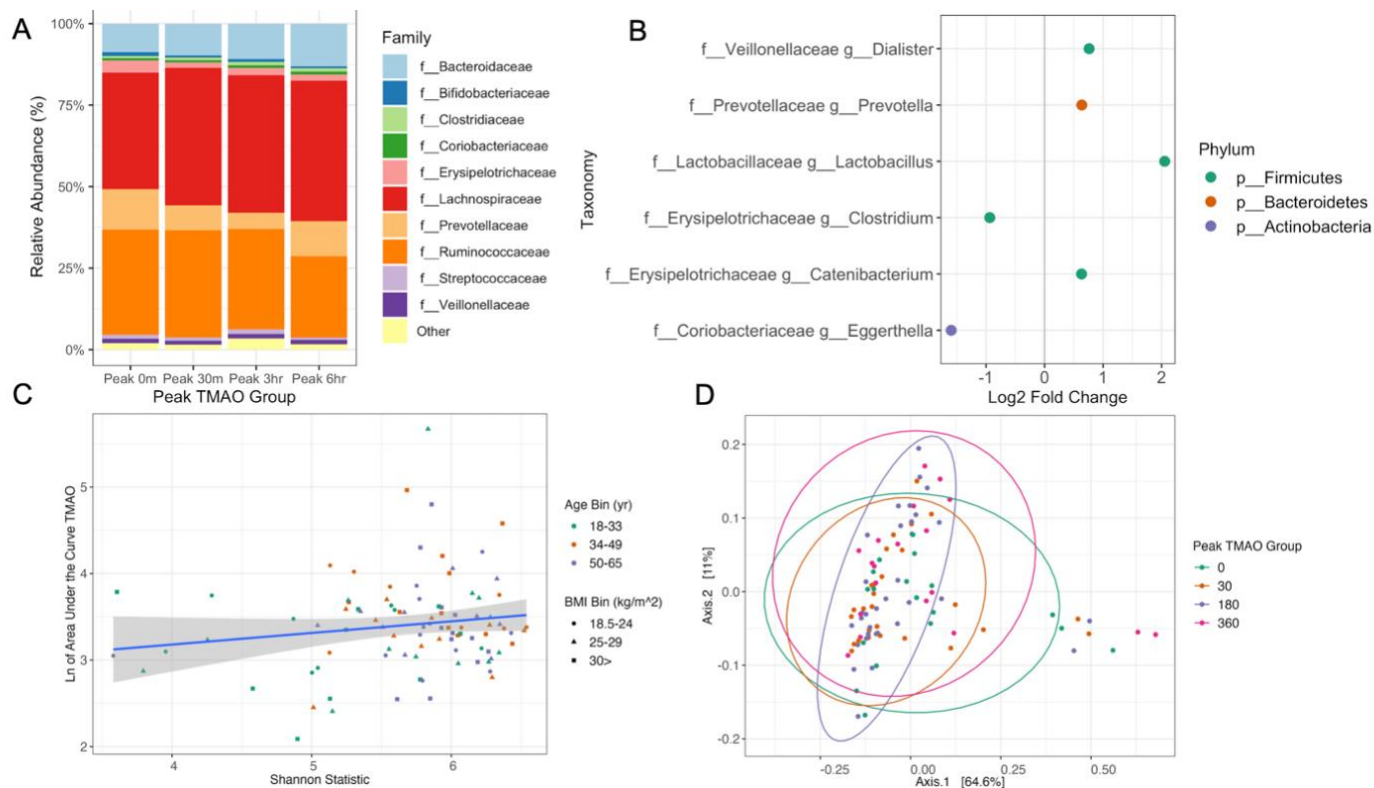

Figure S1. Compositional differences of the fecal microbiota related to TMAO exposure following a MMTT. **(A)** Family level relative abundance by peak-TMAO group. **(B)** Differential abundance in participants with AUC-TMAO concentration below or above the median of 29.25  $\mu\text{M}/\text{h}$  ( $\beta = 0.17$ ,  $p = 0.77$ ). **(C)** Relationship between Shannon  $\alpha$ -diversity and AUC-TMAO. **(D)** Weighted UniFrac  $\beta$ -diversity by peak-TMAO group shows non-significant differences.

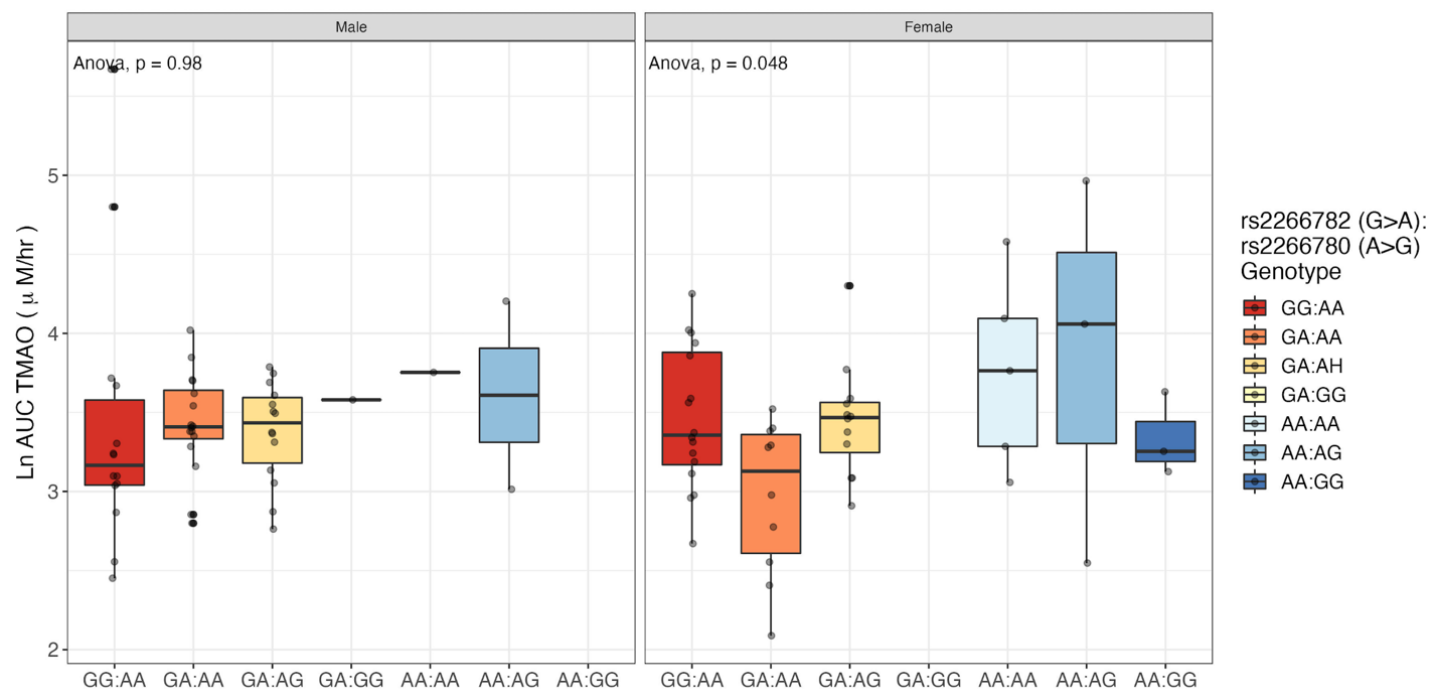

Figure S2. Relationship between *FMO3* allelotype and AUC-TMAO stratified by biological sex. Genotypes are presented by SNP rs2266782 (G>A):rs2266780 (A>G).

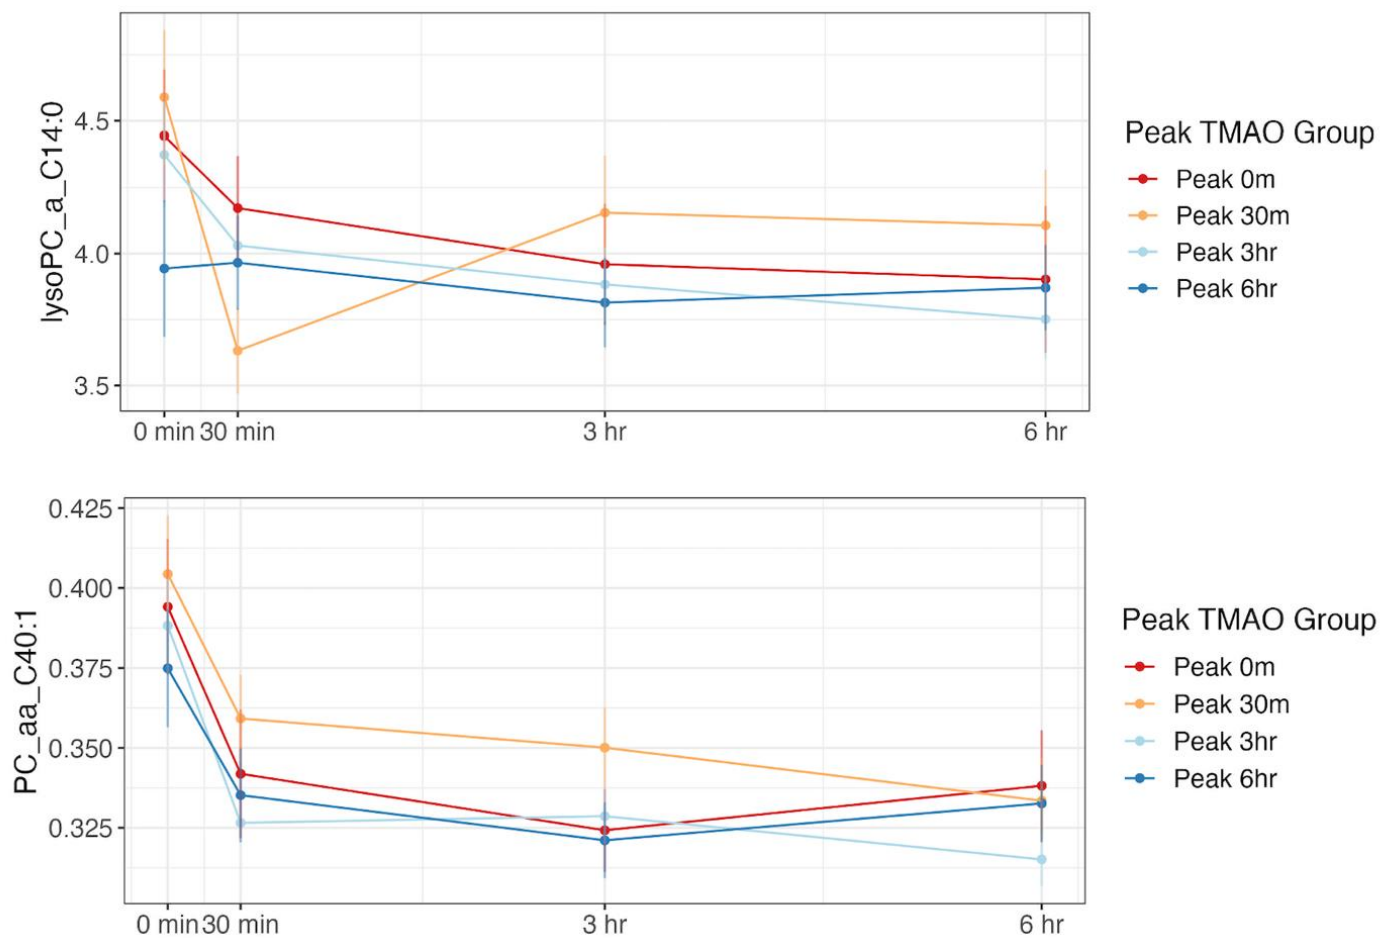

Figure S3. Postprandial responses of lysophosphatidylcholine acyl C14:0 (**top**) and phosphatidylcholine diacyl C40:1 (**bottom**) by peak-TMAO group.
